# Supplementary material for: Cultural applicability and desirability of ‘Broodles’: The first serious game intervention for siblings of children with disabilities
Source: PubMed Central journal article supplement (PMC11000116; doi:10.1016/j.pecinn.2024.100277), 2024-03-26
Supplement: mmc2.pdf [file mmc2.pdf]

1

## Start + Level 1 Broodles

**I liked this**

**I did not like this or this was strange to me**

**I did not understand this**

**I think the worksheet and the task I had to do was**

**What did you learn from the game and worksheet?**

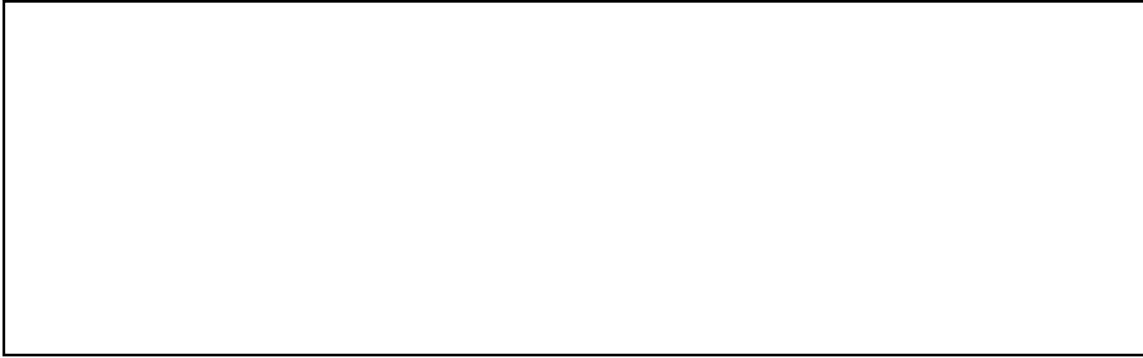A large, empty rectangular box with a black border, intended for the user to write their response to the question above.

**What did you miss in the game or worksheet?**

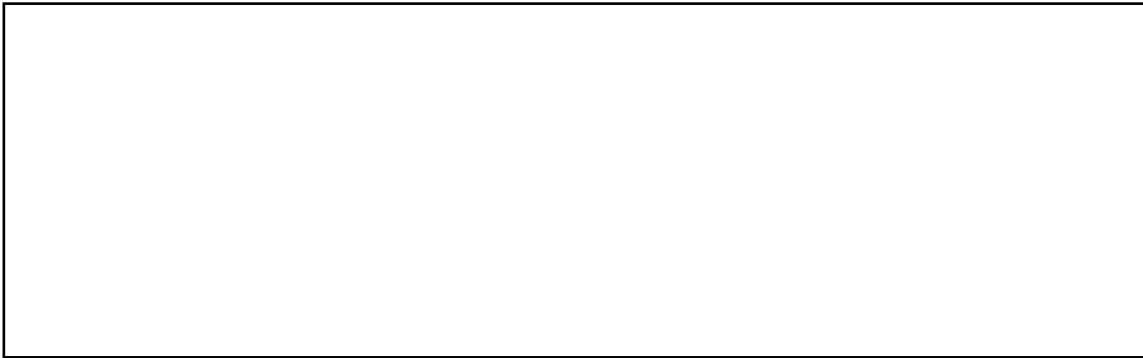A large, empty rectangular box with a black border, intended for the user to write their response to the question above.

## **Serious Game 'Broodles'**

### **Level Specific Evaluation (follow-up questions)**

- What did you (not) like about:
  - The video's of the Broodles
  - The video's of the siblings
  - The quizzes
  - How the game looked
  - The mini-games, including emotion memory, helpful and non-helpful thoughts, hidden object game
  - How long it took to complete the level
  
- What did you think was strange about:
  - How it looked
  - What was said
  
- What did you learn from this level?
  - About your brother/sister
  - About your thoughts and feelings
  - About how to deal with situations
  
- What did you miss in this level?
  - What game element should have been there?
  - Which information would you have wanted about this topic?
